# Supplementary material
Source: publisher figshare collection journal article supplement (https://acs.figshare.com/ndownloader/files/5134972)
Supplement: Supplementary file 1 [file 5134972]

 
data_may5m

_audit_creation_method            SHELXL-97
_chemical_name_systematic
;
Urotropine-N-oxide^.^Formic Acid
;
_chemical_name_common             ?
_chemical_melting_point           ?
_chemical_formula_moiety          
 'C6 H12 N4 O, C H2 O2'
_chemical_formula_sum
 'C7 H14 N4 O3'
_chemical_formula_weight          202.22
 
loop_
 _atom_type_symbol
 _atom_type_description
 _atom_type_scat_dispersion_real
 _atom_type_scat_dispersion_imag
 _atom_type_scat_source
 'C'  'C'   0.0033   0.0016
 'International Tables Vol C Tables 4.2.6.8 and 6.1.1.4'
 'H'  'H'   0.0000   0.0000
 'International Tables Vol C Tables 4.2.6.8 and 6.1.1.4'
 'N'  'N'   0.0061   0.0033
 'International Tables Vol C Tables 4.2.6.8 and 6.1.1.4'
 'O'  'O'   0.0106   0.0060
 'International Tables Vol C Tables 4.2.6.8 and 6.1.1.4'
 
_symmetry_cell_setting            'monoclinic'         
_symmetry_space_group_name_H-M     'P 21/n'
_symmetry_space_group_name_Hall    '-P 2yn'

loop_
 _symmetry_equiv_pos_as_xyz
 'x, y, z'
 '-x+1/2, y+1/2, -z+1/2'
 '-x, -y, -z'
 'x-1/2, -y-1/2, z-1/2'
 
_cell_length_a                    6.774(3)
_cell_length_b                    6.803(3)
_cell_length_c                    19.441(9)
_cell_angle_alpha                 90.00
_cell_angle_beta                  95.329(7)
_cell_angle_gamma                 90.00
_cell_volume                      892.0(7)
_cell_formula_units_Z             4
_cell_measurement_temperature     173(2)
_cell_measurement_reflns_used     6181
_cell_measurement_theta_min       2.10
_cell_measurement_theta_max       26.10
 
_exptl_crystal_description        fragment	
_exptl_crystal_colour             colorless
_exptl_crystal_size_max           0.18
_exptl_crystal_size_mid           0.14
_exptl_crystal_size_min           0.10
_exptl_crystal_density_meas       'not measured'
_exptl_crystal_density_diffrn     1.506
_exptl_crystal_density_method     'not measured'
_exptl_crystal_F_000              432
_exptl_absorpt_coefficient_mu     0.119
_exptl_absorpt_correction_type    'multi-scan'
_exptl_absorpt_correction_T_min   0.863
_exptl_absorpt_correction_T_max   0.988
_exptl_absorpt_process_details    '(SADABS; Sheldrick, 1996)'
 
_exptl_special_details
;
Data were collected using a Bruker AXS SMART 1000 diffractometer 
equipped with a CCD area detector and graphite monochromatized Mo 
source operating with a Nicolet liquid nitrogen cooling system 
at 173K. Data were measured using phi--omega scans of 0.3 degrees
with an integration time of 40 seconds. A total of 2424 frames 
were collected, with the initial 606 frames recollected in the final run. 
;

_diffrn_ambient_temperature       173(2) 
_diffrn_radiation_wavelength      0.71073 
_diffrn_radiation_type            MoK\a 
_diffrn_radiation_source          'fine-focus sealed tube' 
_diffrn_radiation_monochromator   graphite 
_diffrn_measurement_device_type   'Bruker AXS CCD'
_diffrn_measurement_method        'phi and omega scans' 
_diffrn_detector_area_resol_mean  'not measured'
_diffrn_standards_number          '0'  
_diffrn_standards_interval_count  ?
_diffrn_standards_interval_time   ?
_diffrn_standards_decay_%         ?
_diffrn_reflns_number             8145
_diffrn_reflns_av_R_equivalents   0.0221
_diffrn_reflns_av_sigmaI/netI     0.0161
_diffrn_reflns_limit_h_min        -8
_diffrn_reflns_limit_h_max        8
_diffrn_reflns_limit_k_min        -8
_diffrn_reflns_limit_k_max        8
_diffrn_reflns_limit_l_min        -24
_diffrn_reflns_limit_l_max        24
_diffrn_reflns_theta_min          2.10
_diffrn_reflns_theta_max          26.10
_reflns_number_total              1771
_reflns_number_gt                 1565
_reflns_threshold_expression      I>2\s(I) 
 
_computing_data_collection        'SMART (Bruker 1997)'
_computing_cell_refinement        'SAINT (Bruker 1997)'
_computing_data_reduction         'SAINT (Bruker 1997)'
_computing_structure_solution     'SHELXS-97 (Sheldrick, 1997)' 
_computing_structure_refinement   'SHELXL-97 (Sheldrick, 1997)' 
_computing_molecular_graphics     'SHELXTL (Sheldrick, 1997)'
_computing_publication_material   'SHELXTL (Sheldrick, 1997)'
 
_refine_special_details
;
 Refinement of F^2^ against ALL reflections.  The weighted R-factor wR and
 goodness of fit S are based on F^2^, conventional R-factors R are based
 on F, with F set to zero for negative F^2^. The threshold expression of
 F^2^ > 2sigma(F^2^) is used only for calculating R-factors(gt) etc. and is
 not relevant to the choice of reflections for refinement.  R-factors based
 on F^2^ are statistically about twice as large as those based on F, and R-
 factors based on ALL data will be even larger.
;
 
_refine_ls_structure_factor_coef  Fsqd
_refine_ls_matrix_type            full
_refine_ls_weighting_scheme       calc
_refine_ls_weighting_details
 'calc w=1/[\s^2^(Fo^2^)+(0.0445P)^2^+0.3459P] where P=(Fo^2^+2Fc^2^)/3'
_atom_sites_solution_primary      direct
_atom_sites_solution_secondary    difmap
_atom_sites_solution_hydrogens    geom
_refine_ls_hydrogen_treatment     'constr'
_refine_ls_extinction_method      none
_refine_ls_extinction_coef        ?
_refine_ls_number_reflns          1771
_refine_ls_number_parameters      127
_refine_ls_number_restraints      0
_refine_ls_R_factor_all           0.0407
_refine_ls_R_factor_gt            0.0365
_refine_ls_wR_factor_ref          0.1028
_refine_ls_wR_factor_gt           0.0990
_refine_ls_goodness_of_fit_ref    1.204
_refine_ls_restrained_S_all       1.204
_refine_ls_shift/su_max           0.000
_refine_ls_shift/su_mean          0.000
 
loop_
 _atom_site_label
 _atom_site_type_symbol
 _atom_site_fract_x
 _atom_site_fract_y
 _atom_site_fract_z
 _atom_site_U_iso_or_equiv
 _atom_site_adp_type
 _atom_site_occupancy
 _atom_site_symmetry_multiplicity
 _atom_site_calc_flag
 _atom_site_refinement_flags
 _atom_site_disorder_assembly
 _atom_site_disorder_group
N3 N 0.82083(17) 0.67741(17) 0.18170(6) 0.0223(3) Uani 1 1 d . . .
O1 O 0.58061(15) 1.09383(14) 0.08858(5) 0.0240(3) Uani 1 1 d . . .
N1 N 0.66069(16) 0.90585(16) 0.09850(5) 0.0180(3) Uani 1 1 d . . .
N2 N 0.93142(17) 0.70152(18) 0.06608(6) 0.0239(3) Uani 1 1 d . . .
O2 O 0.25262(15) 1.12944(17) 0.12927(5) 0.0315(3) Uani 1 1 d . . .
N4 N 0.60933(17) 0.55527(17) 0.08243(6) 0.0222(3) Uani 1 1 d . . .
O3 O 0.10372(17) 1.20967(19) 0.22259(6) 0.0397(3) Uani 1 1 d . . .
C1 C 0.8407(2) 0.8931(2) 0.05735(7) 0.0213(3) Uani 1 1 d . . .
H1A H 0.8006 0.9159 0.0088 0.026 Uiso 1 1 calc R . .
H1B H 0.9360 0.9937 0.0731 0.026 Uiso 1 1 calc R . .
C5 C 0.51498(19) 0.7450(2) 0.07334(7) 0.0211(3) Uani 1 1 d . . .
H5A H 0.3994 0.7501 0.0993 0.025 Uiso 1 1 calc R . .
H5B H 0.4716 0.7654 0.0249 0.025 Uiso 1 1 calc R . .
C2 C 0.9917(2) 0.6694(2) 0.14003(7) 0.0260(3) Uani 1 1 d . . .
H2A H 1.0554 0.5421 0.1461 0.031 Uiso 1 1 calc R . .
H2B H 1.0874 0.7690 0.1563 0.031 Uiso 1 1 calc R . .
C3 C 0.7842(2) 0.5499(2) 0.04246(7) 0.0260(3) Uani 1 1 d . . .
H3A H 0.7420 0.5706 -0.0061 0.031 Uiso 1 1 calc R . .
H3B H 0.8455 0.4212 0.0472 0.031 Uiso 1 1 calc R . .
C6 C 0.7290(2) 0.8692(2) 0.17422(7) 0.0210(3) Uani 1 1 d . . .
H6A H 0.8233 0.9697 0.1908 0.025 Uiso 1 1 calc R . .
H6B H 0.6164 0.8756 0.2015 0.025 Uiso 1 1 calc R . .
C7 C 0.2512(2) 1.1795(2) 0.19257(8) 0.0261(3) Uani 1 1 d . . .
H7 H 0.3735 1.1942 0.2180 0.031 Uiso 1 1 calc R . .
C4 C 0.6758(2) 0.5256(2) 0.15594(7) 0.0241(3) Uani 1 1 d . . .
H4A H 0.7361 0.3967 0.1621 0.029 Uiso 1 1 calc R . .
H4B H 0.5621 0.5301 0.1828 0.029 Uiso 1 1 calc R . .
H1 H 0.419(3) 1.106(4) 0.1131(12) 0.084(7) Uiso 1 1 d . . .
 
loop_
 _atom_site_aniso_label
 _atom_site_aniso_U_11
 _atom_site_aniso_U_22
 _atom_site_aniso_U_33
 _atom_site_aniso_U_23
 _atom_site_aniso_U_13
 _atom_site_aniso_U_12
N3 0.0255(6) 0.0212(6) 0.0198(5) 0.0012(5) -0.0004(4) -0.0006(5)
O1 0.0288(5) 0.0163(5) 0.0275(5) 0.0027(4) 0.0054(4) 0.0043(4)
N1 0.0202(6) 0.0160(6) 0.0180(5) 0.0004(4) 0.0032(4) 0.0005(4)
N2 0.0222(6) 0.0265(6) 0.0234(6) -0.0026(5) 0.0046(5) 0.0021(5)
O2 0.0234(5) 0.0415(6) 0.0292(6) -0.0064(5) 0.0000(4) 0.0011(5)
N4 0.0249(6) 0.0192(6) 0.0224(6) -0.0017(5) 0.0010(5) -0.0016(5)
O3 0.0336(6) 0.0435(7) 0.0445(7) -0.0014(5) 0.0169(5) 0.0040(5)
C1 0.0209(6) 0.0247(7) 0.0190(6) 0.0003(5) 0.0063(5) -0.0026(5)
C5 0.0190(6) 0.0213(7) 0.0227(6) -0.0005(5) 0.0002(5) -0.0028(5)
C2 0.0207(7) 0.0286(7) 0.0280(7) 0.0013(6) -0.0007(5) 0.0026(6)
C3 0.0305(7) 0.0237(7) 0.0240(7) -0.0063(6) 0.0040(6) 0.0024(6)
C6 0.0260(7) 0.0213(7) 0.0158(6) -0.0016(5) 0.0022(5) -0.0018(6)
C7 0.0243(7) 0.0249(7) 0.0294(7) -0.0004(6) 0.0034(6) -0.0007(6)
C4 0.0288(7) 0.0196(7) 0.0237(7) 0.0026(5) 0.0020(6) -0.0018(6)
 
_geom_special_details
;
 All esds (except the esd in the dihedral angle between two l.s. planes)
 are estimated using the full covariance matrix.  The cell esds are taken
 into account individually in the estimation of esds in distances, angles
 and torsion angles; correlations between esds in cell parameters are only
 used when they are defined by crystal symmetry.  An approximate (isotropic)
 treatment of cell esds is used for estimating esds involving l.s. planes.
;
 
loop_
 _geom_bond_atom_site_label_1
 _geom_bond_atom_site_label_2
 _geom_bond_distance
 _geom_bond_site_symmetry_2
 _geom_bond_publ_flag
N3 C6 1.4469(18) . ?
N3 C2 1.4741(19) . ?
N3 C4 1.4802(18) . ?
O1 N1 1.3956(15) . ?
O1 H1 1.24(2) . ?
N1 C6 1.5221(17) . ?
N1 C1 1.5219(17) . ?
N1 C5 1.5235(17) . ?
N2 C1 1.4443(19) . ?
N2 C2 1.4738(19) . ?
N2 C3 1.4779(19) . ?
O2 C7 1.2776(19) . ?
O2 H1 1.21(2) . ?
N4 C5 1.4439(18) . ?
N4 C4 1.4719(18) . ?
N4 C3 1.4762(18) . ?
O3 C7 1.2205(18) . ?
C1 H1A 0.9700 . ?
C1 H1B 0.9700 . ?
C5 H5A 0.9700 . ?
C5 H5B 0.9700 . ?
C2 H2A 0.9700 . ?
C2 H2B 0.9700 . ?
C3 H3A 0.9700 . ?
C3 H3B 0.9700 . ?
C6 H6A 0.9700 . ?
C6 H6B 0.9700 . ?
C7 H7 0.9300 . ?
C4 H4A 0.9700 . ?
C4 H4B 0.9700 . ?
 
loop_
 _geom_angle_atom_site_label_1
 _geom_angle_atom_site_label_2
 _geom_angle_atom_site_label_3
 _geom_angle
 _geom_angle_site_symmetry_1
 _geom_angle_site_symmetry_3
 _geom_angle_publ_flag
C6 N3 C2 109.29(11) . . ?
C6 N3 C4 109.25(11) . . ?
C2 N3 C4 108.57(11) . . ?
O1 N1 C6 111.29(9) . . ?
N1 O1 H1 110.8(11) . . ?
O1 N1 C1 107.44(9) . . ?
C6 N1 C1 108.21(10) . . ?
O1 N1 C5 112.45(10) . . ?
C6 N1 C5 108.82(10) . . ?
C1 N1 C5 108.51(10) . . ?
C1 N2 C2 108.95(11) . . ?
C1 N2 C3 109.03(11) . . ?
C2 N2 C3 108.50(11) . . ?
C5 N4 C4 109.49(11) . . ?
C5 N4 C3 108.99(11) . . ?
C4 N4 C3 108.62(11) . . ?
C7 O2 H1 112.0(11) . . ?
N2 C1 N1 110.02(10) . . ?
N2 C1 H1A 109.7 . . ?
N1 C1 H1A 109.7 . . ?
N2 C1 H1B 109.7 . . ?
N1 C1 H1B 109.7 . . ?
H1A C1 H1B 108.2 . . ?
N4 C5 N1 109.67(11) . . ?
N4 C5 H5A 109.7 . . ?
N1 C5 H5A 109.7 . . ?
N4 C5 H5B 109.7 . . ?
N1 C5 H5B 109.7 . . ?
H5A C5 H5B 108.2 . . ?
N3 C2 N2 111.72(11) . . ?
N3 C2 H2A 109.3 . . ?
N2 C2 H2A 109.3 . . ?
N3 C2 H2B 109.3 . . ?
N2 C2 H2B 109.3 . . ?
H2A C2 H2B 107.9 . . ?
N4 C3 N2 111.75(11) . . ?
N4 C3 H3A 109.3 . . ?
N2 C3 H3A 109.3 . . ?
N4 C3 H3B 109.3 . . ?
N2 C3 H3B 109.3 . . ?
H3A C3 H3B 107.9 . . ?
N3 C6 N1 109.52(10) . . ?
N3 C6 H6A 109.8 . . ?
N1 C6 H6A 109.8 . . ?
N3 C6 H6B 109.8 . . ?
N1 C6 H6B 109.8 . . ?
H6A C6 H6B 108.2 . . ?
O3 C7 O2 125.80(14) . . ?
O3 C7 H7 117.1 . . ?
O2 C7 H7 117.1 . . ?
N4 C4 N3 111.50(11) . . ?
N4 C4 H4A 109.3 . . ?
N3 C4 H4A 109.3 . . ?
N4 C4 H4B 109.3 . . ?
N3 C4 H4B 109.3 . . ?
H4A C4 H4B 108.0 . . ?
 
loop_
 _geom_torsion_atom_site_label_1
 _geom_torsion_atom_site_label_2
 _geom_torsion_atom_site_label_3
 _geom_torsion_atom_site_label_4
 _geom_torsion
 _geom_torsion_site_symmetry_1
 _geom_torsion_site_symmetry_2
 _geom_torsion_site_symmetry_3
 _geom_torsion_site_symmetry_4
 _geom_torsion_publ_flag
C2 N2 C1 N1 -59.39(13) . . . . ?
C3 N2 C1 N1 58.86(13) . . . . ?
O1 N1 C1 N2 179.52(10) . . . . ?
C6 N1 C1 N2 59.25(13) . . . . ?
C5 N1 C1 N2 -58.66(13) . . . . ?
C4 N4 C5 N1 59.07(13) . . . . ?
C3 N4 C5 N1 -59.61(13) . . . . ?
O1 N1 C5 N4 177.66(10) . . . . ?
C6 N1 C5 N4 -58.57(13) . . . . ?
C1 N1 C5 N4 58.96(13) . . . . ?
C6 N3 C2 N2 -60.52(14) . . . . ?
C4 N3 C2 N2 58.56(15) . . . . ?
C1 N2 C2 N3 60.25(14) . . . . ?
C3 N2 C2 N3 -58.33(15) . . . . ?
C5 N4 C3 N2 60.82(14) . . . . ?
C4 N4 C3 N2 -58.40(15) . . . . ?
C1 N2 C3 N4 -60.34(14) . . . . ?
C2 N2 C3 N4 58.20(14) . . . . ?
C2 N3 C6 N1 59.46(13) . . . . ?
C4 N3 C6 N1 -59.20(13) . . . . ?
O1 N1 C6 N3 -176.85(10) . . . . ?
C1 N1 C6 N3 -59.02(13) . . . . ?
C5 N1 C6 N3 58.70(13) . . . . ?
C5 N4 C4 N3 -60.46(14) . . . . ?
C3 N4 C4 N3 58.45(14) . . . . ?
C6 N3 C4 N4 60.53(14) . . . . ?
C2 N3 C4 N4 -58.57(14) . . . . ?
 
_diffrn_measured_fraction_theta_max    0.996
_diffrn_reflns_theta_full              26.10
_diffrn_measured_fraction_theta_full   0.996
_refine_diff_density_max    0.599
_refine_diff_density_min   -0.183
_refine_diff_density_rms    0.048


#       END of CIF
